1 **GENERAL INFORMATION**

2 **Title:**

3 Summer drought decreases the predictability of local extinctions in a butterfly metapopulation

4 **Authors:**

5 Erik van Bergen<sup>1\*</sup>, Tad Dallas<sup>1,2</sup>, Michelle F. DiLeo<sup>1</sup>, Aapo Kahilainen<sup>1</sup>, Anniina L. K. Mattila<sup>1</sup>, Miska Luoto<sup>3</sup>  
6 and Marjo Saastamoinen<sup>1,4</sup>

7 **Affiliations:**

8 <sup>1</sup> *Research Centre for Ecological Change, Faculty of Biological and Environmental Sciences, University of*  
9 *Helsinki, Helsinki, Finland*

10 <sup>2</sup> *Department of Biological Sciences, Louisiana State University, Baton Rouge, Louisiana, United States*

11 <sup>3</sup> *Department of Geoscience and Geography, University of Helsinki, Helsinki, Finland*

12 <sup>4</sup> *Helsinki Institute of Life Science, University of Helsinki, Finland*

13 \* Corresponding author (erikvanbergen.science@gmail.com)

14 **Keywords:**

15 climate change, extreme climatic events, drought, metapopulation dynamics, population declines, extinctions

16 **ABSTRACT**

17 The ecological impacts of extreme climatic events on population dynamics and/or community composition  
18 are profound and predominantly negative. Here, using extensive data of an ecological model system, we test  
19 whether predictions from ecological models remain robust when environmental conditions are outside the  
20 bounds of observation. First, we report a 10-fold demographic decline of the Glanville fritillary butterfly  
21 metapopulation on the Åland islands (Finland). Next, using climatic and satellite data we show that the  
22 summer of 2018 was an anomaly in terms of water balance and vegetation productivity indices across the  
23 habitats of the butterfly, and demonstrate that population growth rates are strongly associated with spatio-  
24 temporal variation in climatic water balance. Finally, we demonstrate that covariates that have previously  
25 been identified to impact the extinction probability of local populations in this system are less informative  
26 when populations are exposed to (severe) drought during the summer months. Our results highlight the  
27 unpredictable responses of natural populations to extreme climatic events.

## 28 1. INTRODUCTION

29 One of the major challenges in conservation biology is to identify the species and populations that are most  
30 vulnerable to extinction. Long-term monitoring of ecological model systems, both at local and global scales,  
31 have facilitated conservation objectives by identifying the factors affecting population declines and  
32 extinctions (Hanski et al. 1995; Pimm et al. 2014; Dornelas et al. 2019). In addition, ecological models  
33 aiming to improve our understanding of population dynamics in temporally varying environments have been  
34 employed to shed light on which regions should receive priority for conservation and to predict which  
35 species and/or populations are most vulnerable (e.g. Franklin et al. 2014; Oliver et al. 2015). In temporally  
36 autocorrelated environments, where conditions tend to change gradually, these predictions may be reliable  
37 over short timescales, and can therefore be used to make conservation efforts more effective.

38 When populations are exposed to conditions that are beyond the normal range, such as in the case of extreme  
39 climatic events (ECEs), the factors underlying population dynamics may be less relevant and consequently  
40 predictions relying on these factors less reliable. ECEs have increased in recent decades, not only in  
41 frequency but also in intensity and duration (Jentsch et al. 2007; Coumou & Rahmstorf 2012; Ummenhofer  
42 & Meehl 2017). Recent studies have demonstrated that even a single ECE, such as a flood or a drought, can  
43 have profound impacts on natural populations (Bailey & van de Pol 2016; Altwegg et al. 2017; Grant et al.  
44 2017), and can even cause the collapse of an entire ecosystem (Anderson et al. 2017; Harris et al. 2018). For  
45 example, a pan-tropical episode of coral bleaching, triggered by a marine heatwave in 2016, eradicated over  
46 60% of the coral communities in the Great Barrier Reef (Hughes et al. 2017).

47 Studies assessing impacts of ECEs are generally conducted by performing perturbation experiments (e.g.  
48 Bokhorst et al. 2008; Pansch et al. 2018) or by opportunistically taking advantage of a rare event (e.g. Smith  
49 2011; Grant et al. 2017). The latter often concentrate on a single population and relatively small spatial  
50 scales, or lack long-term ecological monitoring of the system prior to the ECE (but see Thibault & Brown  
51 2008; Campbell-Staton et al. 2017). Here, we report a dramatic demographic decline of the Glanville  
52 fritillary butterfly (*Melitaea cinxia*) metapopulation on the Åland archipelago in south-west Finland due to a  
53 severe drought in the summer of 2018. This iconic butterfly metapopulation has become an important  
54 ecological model system for studying the factors affecting local population dynamics and extinction risks in  
55 fragmented landscapes (Hanski 1998; Ovaskainen & Saastamoinen 2018). Due to (ongoing) systematic

56 monitoring, the system provides a unique opportunity to improve our understanding of how large spatially-  
57 structured natural populations respond to extreme climatic conditions, and to study how ECEs affect the  
58 value of predictive models.

59 Since 1993, the occupancy and abundance of local populations of the butterflies, across a network of about  
60 4400 dry meadows, has been systematically monitored. Estimates of local population sizes are acquired  
61 during autumn when all potential habitat patches are surveyed for the presence of the winter nests (for details  
62 see; Ojanen et al. 2013). Despite increasing year-to-year fluctuations (Hanski & Meyke 2005; Tack et al.  
63 2015), the overall size of the metapopulation has remained relatively stable, with about 20% of the available  
64 habitat patches being occupied each year. Survey data have been used to demonstrate that the long-term  
65 persistence and population dynamics (local extinctions and re-colonizations) of the metapopulation largely  
66 depends on the number of available habitat patches, their area, and their spatial configuration (i.e.  
67 connectivity; Hanski & Ovaskainen 2000; Dallas et al. 2019). Other key factors impacting local extinctions  
68 and population dynamics are the habitat quality (e.g. amount of host plants; Harrison et al. 2011; Schulz et al.  
69 2019) and genetic characteristics of the individuals (Saccheri et al. 1998; Niitepõld & Saastamoinen 2017).

70 We recently demonstrated that variation in population growth rates is strongly associated with variation in  
71 temperature and precipitation across the habitat patch network (Kahilainen et al. 2018). Spatial variability in  
72 these climatic conditions contributes to the overall stability of the metapopulation by ensuring that local  
73 extinctions are compensated by stable or increased population sizes and colonization rates in other areas of  
74 the metapopulation. As the climatic conditions have become more homogeneous across Åland in the last  
75 decade, the Glanville fritillary metapopulation has now become more spatially synchronous in its  
76 demographic dynamics (Kahilainen et al. 2018), potentially making it more vulnerable to large-scale  
77 environmental perturbations (Hanski & Woiwod 1993).

78 Here, we identify the key anomalies that occurred in the summer of 2018 on the Åland islands and  
79 demonstrate that exposure to these extremes was sufficient to drive the regional population declines of the  
80 butterfly observed across the metapopulation. Secondly, we explore how the ECE impacts the performance  
81 of ecological models by testing whether the covariates that have previously been identified to affect local  
82 extinctions in this system remain informative under extreme climatic conditions.



## 83 2. MATERIAL AND METHODS

### 84 2.1 Long-term data survey

85 On the Åland islands, the Glanville fritillary inhabits dry meadows and pastures with at least one of the two  
86 larval host plant species, the ribwort plantain (*Plantago lanceolata*) or the spiked speedwell (*Veronica*  
87 *spicata*) present. The entire study region (50 × 70 km) has been mapped for potential habitat patches, with a  
88 total of 4,415 patches (September 2015). The population occupancy (presence of a larval nest within a  
89 habitat patch) and abundance (total number of larval nests within a habitat patch) is assessed annually when  
90 the larvae have entered the overwintering stage within their conspicuous larval nests. All the habitat patches  
91 on the archipelago are inspected with the help of approximately 50 field assistants. In the field, the locations  
92 of the larval nests are marked and data are stored into the EarthCape database (Ojanen et al. 2013). The  
93 occupancy and abundance data comprise raw counts, which is a function of both population size but also of  
94 detection probability. Estimates from control surveys conducted before 2018 suggest that the presence of the  
95 butterfly may be missed in up to 15% of the occupied patches, with non-detection mainly occurring in very  
96 small populations (Hanski et al. 2017).

### 97 2.2 Climatic and vegetation index data

98 Normalized Difference Vegetation Index (NDVI) and the Enhanced Vegetation Index (EVI) values were  
99 derived from Moderate Resolution Imaging Spectrometer (MODIS, resolution 250 m; Guay et al. 2014).  
100 Both NDVI and EVI data are available on a 16-day basis for a 19-year period between 2000 and 2018. Data  
101 are derived from bands 1 and 2 of the MODIS on board NASA's Terra satellite. A time-series of NDVI and  
102 EVI observations can be used to examine the dynamics of the growing season, ecosystem health or monitor  
103 phenomena such as droughts. EVI is an 'optimized' vegetation index designed to enhance the vegetation  
104 signal with improved sensitivity in high biomass regions and improved vegetation monitoring through a  
105 decoupling of the canopy background signal and a reduction in atmosphere influences. NDVI and EVI  
106 values were calculated for each of the 4,415 habitat patches from April to August. Monthly temperature and  
107 precipitation values and water balance (precipitation - potential evaporation) are derived from Jomala  
108 weather station (60.18° N, 19.99° E, 11 m a.s.l.) database. Climatic water balance was quantified by  
109 precipitation minus potential evapotranspiration (PET). PET is the amount of evaporation and transpiration  
110 that would occur if a sufficient water source were available. PET was calculated using the Penman-Monteith

111 equation (Guo et al. 2016). Based on the climatic water balance values a time-series of the Standardized  
112 Precipitation-Evapotranspiration Index (SPEI) was calculated (Vicente-Serrano et al. 2009). An important  
113 advantage of the SPEI is that it can be computed at different time scales. This way it is possible to  
114 incorporate the influence of the past values of the variable in the computation, and the magnitude of these  
115 values is by parameter scale. For example, a value of three would imply that data from the current month and  
116 of the past two months will be used for computing the SPEI or SPI value for a given month.

### 117 **2.3 Population growth rate model**

118 Following an analysis pipeline developed for the Glanville fritillary metapopulation (Kahilainen et al. 2018),  
119 we fitted a Bayesian linear mixed effects model to study the association between weather conditions and  
120 population growth rate at the regional scale. Instead of using monthly temperature and precipitation values,  
121 we used monthly water balance indices, which are more explicitly associated with drought conditions. We  
122 first divided individual habitat patches into groups of spatially clustered semi-independent habitat patch  
123 networks (SIN; see Hanski et al. 2017) and derived yearly population growth rates ( $r$ ) as:

$$124 \quad r_{SIN,t} = \log[(N_{SIN,t} + 1)/(N_{SIN,t-1} + 1)] ,$$

125 where  $N_{SIN,t}$  is the number of overwintering larval nest found in a SIN in the fall of year  $t$ . We then extracted  
126 water balance data for each SIN (see previous section) and fitted a linear mixed model for population growth  
127 rate using the water balance values across different life-history stages of the butterfly as covariates. In the  
128 model we included a random intercept and a first order autocorrelation term for each SIN. We implemented  
129 the model in Stan statistical modelling platform (Carpenter et al. 2017), using R packages brms (version  
130 2.7.0; Bürkner 2017) and RStan (2.17.3; Stan Development Team 2018) as its interface. For further details  
131 regarding the analysis pipeline and implementation of the model, see Kahilainen et al. 2018. From the model  
132 we then obtained fitted annual growth rates for each of the 33 SINs included in the data and compared these  
133 with the observed growth rate values (Fig. 3).

### 134 **2.4 Extinction probability model**

135 We fitted a linear mixed effect model (logit link function) to binary patch extinction data calculated for each  
136 year of the survey between 1999 and 2018 to examine whether the high extinction rates in 2018 could be  
137 attributable to covariates previously recognized to impact the extinction probability of local populations

138 (Hanski et al. 1995; Saccheri et al. 1998). Year was included as a random effect. Environmental variables  
139 included as fixed effects were the natural logarithm of patch area, the amount of the dominant host plant in  
140 each patch estimated on a scale of 1-3, the percent of host plants that were dried out, and the percent of the  
141 patch that was grazed (see Ojanen et al. 2013 for more details). Historical contingency was accounted for by  
142 considering the natural logarithm of the number of larval nests in each focal patch in the previous year, and  
143 the number of larval nests in the neighbourhood of each focal patch in the previous year, defined as:

144 
$$\log\left(\sum e^{-d_{ij}} N_j\right)$$

145 where,  $d$  is the distance between focal patch  $i$  and  $j$ , and  $N_j$  is the number of nests in patch  $j$  in the previous  
146 year. We trained the model using 80% of the data, and subsequently assessed model performance –  
147 quantified using the area under the receiver operating characteristic (AUC) – on the remaining 20% of the  
148 data. This procedure was repeated 10 times in order to assess the sensitivity of model performance to the  
149 train/test split.

### 150 3. RESULTS

#### 151 3.1 Demographic declines across the butterfly metapopulation in 2018

152 Despite systematic surveying efforts, an all-time low of only 91 larval nests were recorded during the autumn  
153 survey in 2018 (the average number of nests recorded each year is 2750; figure 1). The number of occupied  
154 habitat patches was also an order of magnitude lower than in any average year ( $N=54$ ; figure 1A), and only a  
155 single colonization event was recorded. The number of larval nests recorded within the occupied habitat  
156 patches was approximately 65% below the average (table S1).

#### 157 3.2 Large deviations from past climatic conditions

158 Like many regions in Northern Europe, the habitat patches on the Åland islands received remarkably low  
159 levels of precipitation in the summer of 2018. The effect of this shortage was intensified by record-breaking  
160 temperatures (figure S1), resulting in the lowest climatic water balance values on record at the Jomala  
161 weather station in Åland (1960-2018; figure 2A). Consequently, the summer of 2018 was anomalous also in  
162 terms of primary productivity. Satellite-derived vegetation indices [Normalized Difference Vegetation Index  
163 (NDVI) and Enhanced Vegetation Index (EVI)], available since 2000, demonstrate low levels of vegetation  
164 productivity within the pastures and dry meadows inhabited by the butterfly in 2018 (figure 2B). The latter

165 likely reflects also reduced host plant quality and availability during the periods when the post- and pre-  
166 diapause butterfly larvae are feeding (see figure 1B).

### 167 **3.3 Drought drives regional population declines**

168 We examined whether the extreme climatic conditions experienced by the butterfly in 2018 were sufficient to  
169 drive population declines at the scale of the semi-independent patch networks (SINs; Hanski et al. 2017).  
170 Overall, monthly water balance indices – especially the water deficits during May and July – were highly  
171 associated with population declines at the SIN level (figure 3; table S2). With few exceptions, the model  
172 residuals for 2018 were negative, indicating that the observed declines in most SINs were more severe than  
173 suggested by the model fit (figure 3). Indeed, SIN level population declines in 2018 were among the most  
174 dramatic ones observed since the start of the annual survey, with nearly 80% of the growth rate values falling  
175 within the lowest 5 percentile (figure 3; table S1).

### 176 **3.4 Summer drought decreases the predictability of local extinctions**

177 We first confirmed the previously identified factors affecting extinction probability of local populations in  
178 this system. In short, the probability of extinction is lower in habitat patches that are large and well-  
179 connected. Patches with low population densities in the previous year, reduced host plant availability, or  
180 those used for livestock grazing, have higher extinction probabilities (table S3). Secondly, we estimated the  
181 predictive accuracy of our environmental extinction model. The mean AUC score across the 20 years was  
182 0.76, implying that model covariates predict the extinction of a local population reasonably well (figure 4a;  
183 AUC scores above 0.80 reflect good discrimination (Swets 1988). The AUC scores varied significantly  
184 across years with the lowest values observed in years that are characterized by water deficits during summer  
185 (figure 4b). Model covariates were more likely to predict the extinction probability correctly in the years  
186 prior to the ECE of 2018.

187

#### 188 4. DISCUSSION

189 The ongoing climate crisis is expected to result in a rapid increase in the frequency, intensity and duration of  
190 extreme climatic events (e.g. Sun et al. 2014; Fischer & Knutti 2015). Owing to the profound impacts these  
191 extreme events can have on ecological functioning, the vulnerability of natural populations to the impacts of  
192 climate change may be severely underestimated (Anderson et al. 2017; Ummenhofer & Meehl 2017).

193 The Åland islands, like many other regions across the northern-hemisphere, sustained severe drought in the  
194 summer of 2018. Using extensive long-term data of the spatially-structured natural population of the  
195 Glanville fritillary butterfly, we demonstrate that both the climatic conditions during the summer and  
196 biological response of the metapopulation exceeded the 5% threshold values typically used to define ECEs  
197 (van de Pol et al. 2017). The majority of studies investigating the impacts of ECEs have focussed on the  
198 ability of organisms to cope with the direct effects of the extreme environmental conditions (Hoffmann &  
199 Sgrò 2018). While an organisms' critical physiological limits are likely to be important risk factors,  
200 extinctions of local populations could also be triggered indirectly (Maron et al. 2015; Johansson et al. 2020).  
201 Our estimates of the occupancy and abundance of local populations across the archipelago are collected in  
202 the autumn, and hence only represent populations that survived the potentially harsh summer conditions.  
203 Therefore, we cannot infer whether the population declines and local extinctions were triggered directly by  
204 the arid conditions, or indirectly through for example climate-induced restrictions in resource availability  
205 (Maron et al. 2015). Nonetheless, using satellite-derived vegetation indices we demonstrate here that  
206 productivity was substantially reduced within the habitat patches of the butterflies in 2018. These data  
207 suggest that the severe drought negatively impacted the quality and availability of the host plants of these  
208 herbivorous insects, making resources scarce when demands were high. These results are in line with  
209 detailed observations made in 12 focal patches in 2018, where despite observing large numbers of clutches in  
210 early summer only two larval nests were found in autumn (Salgado et al. 2020).

211 We explored whether the strong deviations from usually experienced conditions influenced our ability to  
212 forecast the short-term biological response of the metapopulation, both at a regional and local scale. First, we  
213 demonstrate that the population growth rates at regional scales (i.e. the level of SIn; Hanski et al. 2017) are  
214 positively associated with climatic water balance during summer months (table S2). In other words,  
215 population sizes of this drought-sensitive butterfly species declined in years that were characterized by water

216 deficits during summer (see also Oliver et al. 2015; Kahilainen et al. 2018). This result strongly points  
217 towards climatic conditions as the key driver of the dramatic decline of the metapopulation in 2018. In  
218 addition, we find that the relationship between the climatic variables and the biological response of the  
219 metapopulation is largely linear (i.e. model residuals of 2018 are negative, but generally do not exceed model  
220 confidence limits; figure 3; van de Pol et al. 2017). These results highlight that our detailed understanding of  
221 the population dynamics of this ecological system allowed us to – at least in part – forecast the observed  
222 population declines in response to the described extreme event.

223 While we were able to capture climate-induced changes in dynamics at regional scales, we were less  
224 successful in predicting the extinction probabilities of local populations in 2018 (figure 4a). In general, the  
225 model covariates, such as habitat size and connectivity, were likely to predict the extinction probability  
226 correctly in years when water availability was reduced during summer. In 2018, even populations inhabiting  
227 large and well-connected patches with high abundance in the previous year went extinct. This suggests that  
228 summer droughts, and in particular the extreme climatic conditions of 2018, may force the population over a  
229 threshold in which local extinctions are driven by factors other than those highlighted in previous studies  
230 with the system (reviewed in Ovaskainen & Saastamoinen 2018). Hence, uncharacterised ecological  
231 variables, such as the water holding capacity of the patch and/or the microhabitat heterogeneity within each  
232 meadow or pasture, may potentially be important determinants of population persistence under arid  
233 environmental conditions. In addition, stochastic processes may become more important in dry years.

234 As a potential caveat we note that, despite using a systematic and methodical protocol, our probability to  
235 detect the presence of the butterfly is known to be reduced in very small populations (Hanski et al. 2017).  
236 Hence, strong climate-induced declines in population sizes may therefore contribute to decreased detection  
237 rates (and, consequently, an overestimation of the biological response). Other variables, such as reduced nest  
238 sizes or shifts in habitat choice, may potentially also negatively affect detectability under climatic extremes.  
239 However, our surveying protocol dictates that when a patch is judged to be unoccupied, it should  
240 immediately be re-surveyed with the same effort (Ojanen et al. 2013). Owing to this safeguard mechanism  
241 the majority of the patches were surveyed twice in 2018, reducing the potential influence of the ECE on nest  
242 detectability.

243 The documentation of the demographic crash of the Glanville fritillary metapopulation highlights the  
244 vulnerability of natural populations and underscores the importance of long-term monitoring programs to  
245 effectively document the consequences of ECEs on species, population and community dynamics.  
246 Our results further demonstrate that ECEs can impede conservation efforts by reducing the value of  
247 predictive models. For example, even within this extensively understood study system any effort to  
248 potentially mitigate the impacts of the ECE on local populations would likely have failed, since we would  
249 not have been able to predict which local populations were most vulnerable. The long-term implications of  
250 the ECE of 2018 are yet to be realized and continuation of the metapopulation survey during the following  
251 years will demonstrate whether the disruption from the normal extinction-colonization dynamics has driven  
252 this iconic metapopulation close to its tipping point (Dai et al. 2013) or whether the remaining populations  
253 will recover from this rare perturbation event. In the case of the latter, this will provide a unique and exciting  
254 opportunity to study the long-term ecological and evolutionary impacts of an ECE in a spatially-structured  
255 population.

256

## 257 **Acknowledgements**

258 We are grateful to all researchers and field assistants that have participated in the field work on Åland  
259 between 1993 and 2018. Financial support was provided by the European Research Council (StG grant  
260 META-STRESS no. 637412 to M.S.). The authors declare no conflicts of interest.

## 261 **Authors contributions**

262 All authors contributed to the conception and design of the work. MS and ML contributed to the acquisition  
263 of the data. TD, MFD and AK performed the analyses and EvB and AM prepared the figures. EvB, AM and  
264 MS wrote the first draft of the manuscript. All authors contributed and approved the final manuscript.

## 265 **Competing interests**

266 The authors declare no competing interests.

## 267 **Data availability**

268 Datasets used in this study are available online at (will be deposited in Dryad once accepted for publication).

269 **Supplementary Materials:**

270 Tables S1 - S3 ; Figure S1



## 271 5. REFERENCES

- Altwegg, R., Visser, V., Bailey, L.D. & Erni, B. (2017). Learning from single extreme events. *Philosophical Transactions of the Royal Society B: Biological Sciences*, 372, 20160141.
- Anderson, S.C., Branch, T.A., Cooper, A.B. & Dulvy, N.K. (2017). Black-swan events in animal populations. *Proc Natl Acad Sci USA*, 114, 3252.
- Bailey, L.D. & van de Pol, M. (2016). Tackling extremes: challenges for ecological and evolutionary research on extreme climatic events. *Journal of Animal Ecology*, 85, 85–96.
- Bokhorst, S., Bjerke, J.W., Bowles, F.W., Melillo, J., Callaghan, T.V. & Phoenix, G.K. (2008). Impacts of extreme winter warming in the sub-Arctic: growing season responses of dwarf shrub heathland. *Global Change Biology*, 14, 2603–2612.
- Bürkner, P.-C. (2017). brms: An R Package for Bayesian Multilevel Models Using Stan. *Journal of Statistical Software; Vol 1, Issue 1 (2017)*.
- Campbell-Staton, S.C., Cheviron, Z.A., Rochette, N., Catchen, J., Losos, J.B. & Edwards, S.V. (2017). Winter storms drive rapid phenotypic, regulatory, and genomic shifts in the green anole lizard. *Science*, 357, 495.
- Carpenter, B., Gelman, A., Hoffman, M.D., Lee, D., Goodrich, B., Betancourt, M., Brubaker, M., Guo, J., Li, P. & Riddell, A. (2017). Stan: A Probabilistic Programming Language. *Journal of Statistical Software; Vol 1, Issue 1 (2017)*.
- Coumou, D. & Rahmstorf, S. (2012). A decade of weather extremes. *Nature Climate Change*, 2, 491–496.
- Dai, L., Korolev, K.S. & Gore, J. (2013). Slower recovery in space before collapse of connected populations. *Nature*, 496, 355.
- Dallas, T.A., Saastamoinen, M., Schulz, T. & Ovaskainen, O. (2019). The relative importance of local and regional processes to metapopulation dynamics. *Journal of Animal Ecology*, n/a.
- Dornelas, M., Gotelli, N.J., Shimadzu, H., Moyes, F., Magurran, A.E. & McGill, B.J. (2019). A balance of winners and losers in the Anthropocene. *Ecology Letters*, 22, 847–854.
- Fischer, E.M. & Knutti, R. (2015). Anthropogenic contribution to global occurrence of heavy-precipitation and high-temperature extremes. *Nature Climate Change*, 5, 560–564.
- Franklin, J., Regan, H.M. & Syphard, A.D. (2014). Linking spatially explicit species distribution and population models to plan for the persistence of plant species under global change. *Environmental Conservation*, 41, 97–109.
- Grant, P.R., Grant, B.R., Huey, R.B., Johnson, M.T.J., Knoll, A.H. & Schmitt, J. (2017). Evolution caused by extreme events. *Philosophical Transactions of the Royal Society B: Biological Sciences*, 372, 20160146.
- Guay, K.C., Beck, P.S.A., Berner, L.T., Goetz, S.J., Baccini, A. & Buermann, W. (2014). Vegetation productivity patterns at high northern latitudes: a multi-sensor satellite data assessment. *Global Change Biology*, 20, 3147–3158.
- Guo, D., Westra, S. & Maier, H.R. (2016). An R package for modelling actual, potential and reference evapotranspiration. *Environmental Modelling & Software*, 78, 216–224.
- Hanski, I. (1998). Metapopulation dynamics. *Nature*, 396, 41–49.
- Hanski, I. & Meyke, E. (2005). Large-scale dynamics of the Glanville fritillary butterfly: landscape structure, population processes, and weather. *Annales Zoologici Fennici*, 42, 379–395.
- Hanski, I. & Ovaskainen, O. (2000). The metapopulation capacity of a fragmented landscape. *Nature*, 404, 755–758.
- Hanski, I., Pakkala, T., Kuussaari, M. & Lei, G. (1995). Metapopulation Persistence of an Endangered Butterfly in a Fragmented Landscape. *Oikos*, 72, 21–28.

- Hanski, I., Schulz, T., Wong, S.C., Ahola, V., Ruokolainen, A. & Ojanen, S.P. (2017). Ecological and genetic basis of metapopulation persistence of the Glanville fritillary butterfly in fragmented landscapes. *Nature Communications*, 8, 14504.
- Hanski, I. & Woiwod, I.P. (1993). Spatial Synchrony in the Dynamics of Moth and Aphid Populations. *Journal of Animal Ecology*, 62, 656–668.
- Harris, R.M.B., Beaumont, L.J., Vance, T.R., Tozer, C.R., Remenyi, T.A., Perkins-Kirkpatrick, S.E., Mitchell, P.J., Nicotra, A.B., McGregor, S., Andrew, N.R., Letnic, M., Kearney, M.R., Wernberg, T., Hutley, L.B., Chambers, L.E., Fletcher, M.-S., Keatley, M.R., Woodward, C.A., Williamson, G., Duke, N.C. & Bowman, D.M.J.S. (2018). Biological responses to the press and pulse of climate trends and extreme events. *Nature Climate Change*, 8, 579–587.
- Harrison, P.J., Hanski, I. & Ovaskainen, O. (2011). Bayesian state-space modeling of metapopulation dynamics in the Glanville fritillary butterfly. *Ecological Monographs*, 81, 581–598.
- Hoffmann, A.A. & Sgrò, C.M. (2018). Comparative studies of critical physiological limits and vulnerability to environmental extremes in small ectotherms: How much environmental control is needed? *Integrative Zoology*, 13, 355–371.
- Hughes, T.P., Kerry, J.T., Álvarez-Noriega, M., Álvarez-Romero, J.G., Anderson, K.D., Baird, A.H., Babcock, R.C., Beger, M., Bellwood, D.R., Berkemans, R., Bridge, T.C., Butler, I.R., Byrne, M., Cantin, N.E., Comeau, S., Connolly, S.R., Cumming, G.S., Dalton, S.J., Diaz-Pulido, G., Eakin, C.M., Figueira, W.F., Gilmour, J.P., Harrison, H.B., Heron, S.F., Hoey, A.S., Hobbs, J.-P.A., Hoogenboom, M.O., Kennedy, E.V., Kuo, C., Lough, J.M., Lowe, R.J., Liu, G., McCulloch, M.T., Malcolm, H.A., McWilliam, M.J., Pandolfi, J.M., Pears, R.J., Pratchett, M.S., Schoepf, V., Simpson, T., Skirving, W.J., Sommer, B., Torda, G., Wachenfeld, D.R., Willis, B.L. & Wilson, S.K. (2017). Global warming and recurrent mass bleaching of corals. *Nature*, 543, 373.
- Jentsch, A., Kreyling, J. & Beierkuhnlein, C. (2007). A New Generation of Climate-Change Experiments: Events, Not Trends. *Frontiers in Ecology and the Environment*, 5, 365–374.
- Johansson, V., Kindvall, O., Askling, J. & Franzén, M. (2020). Extreme weather affects colonization-extinction dynamics and the persistence of a threatened butterfly. *Journal of Applied Ecology*, n/a.
- Kahilainen, A., van Nouhuys, S., Schulz, T. & Saastamoinen, M. (2018). Metapopulation dynamics in a changing climate: Increasing spatial synchrony in weather conditions drives metapopulation synchrony of a butterfly inhabiting a fragmented landscape. *Global Change Biology*, 24, 4316–4329.
- Maron, M., McAlpine, C.A., Watson, J.E.M., Maxwell, S. & Barnard, P. (2015). Climate-induced resource bottlenecks exacerbate species vulnerability: a review. *Diversity and Distributions*, 21, 731–743.
- Niitepõld, K. & Saastamoinen, M. (2017). A Candidate Gene in an Ecological Model Species: Phosphoglucose Isomerase (Pgi) in the Glanville Fritillary Butterfly (*Melitaea cinxia*). *Annales Zoologici Fennici*, 54, 259–273.
- Ojanen, S.P., Nieminen, M., Meyke, E., Pöyry, J. & Hanski, I. (2013). Long-term metapopulation study of the Glanville fritillary butterfly (*Melitaea cinxia*): survey methods, data management, and long-term population trends. *Ecology and Evolution*, 3, 3713–3737.
- Oliver, T.H., Marshall, H.H., Morecroft, M.D., Brereton, T., Prudhomme, C. & Huntingford, C. (2015). Interacting effects of climate change and habitat fragmentation on drought-sensitive butterflies. *Nature Climate Change*, 5, 941.
- Ovaskainen, O. & Saastamoinen, M. (2018). Frontiers in Metapopulation Biology: The Legacy of Ilkka Hanski. *Annu. Rev. Ecol. Evol. Syst.*, 49, 231–252.
- Pansch, C., Scotti, M., Barboza, F.R., Al-Janabi, B., Brakel, J., Briski, E., Bucholz, B., Franz, M., Ito, M., Paiva, F., Saha, M., Sawall, Y., Weinberger, F. & Wahl, M. (2018). Heat waves and their significance for a temperate benthic community: A near-natural experimental approach. *Global Change Biology*, 24, 4357–4367.
- Pimm, S.L., Jenkins, C.N., Abell, R., Brooks, T.M., Gittleman, J.L., Joppa, L.N., Raven, P.H., Roberts, C.M. & Sexton, J.O. (2014). The biodiversity of species and their rates of extinction, distribution, and protection. *Science*, 344, 1246752.

- van de Pol, M., Jenouvrier, S., Cornelissen, J.H.C. & Visser, M.E. (2017). Behavioural, ecological and evolutionary responses to extreme climatic events: challenges and directions. *Philosophical Transactions of the Royal Society B: Biological Sciences*, 372, 20160134.
- Saccheri, I., Kuussaari, M., Kankare, M., Vikman, P., Fortelius, W. & Hanski, I. (1998). Inbreeding and extinction in a butterfly metapopulation. *Nature*, 392, 491–494.
- Salgado, A.L., DiLeo, M.F. & Saastamoinen, M. (2020). Narrow oviposition preference of an insect herbivore risks survival under conditions of severe drought. *BioRxiv*:2020.03.24.005686. (doi.org/10.1101/2020.03.24.005686)
- Schulz, T., Vanhatalo, J. & Saastamoinen, M. (2019). Long-term demographic surveys reveal a consistent relationship between average occupancy and abundance within local populations of a butterfly metapopulation. *Ecography*, n/a.
- Smith, M.D. (2011). An ecological perspective on extreme climatic events: a synthetic definition and framework to guide future research. *Journal of Ecology*, 99, 656–663.
- Sun, Y., Zhang, X., Zwiers, F.W., Song, L., Wan, H., Hu, T., Yin, H. & Ren, G. (2014). Rapid increase in the risk of extreme summer heat in Eastern China. *Nature Climate Change*, 4, 1082–1085.
- Swets, J. (1988). Measuring the accuracy of diagnostic systems. *Science*, 240, 1285.
- Tack, A.J.M., Mononen, T. & Hanski, I. (2015). Increasing frequency of low summer precipitation synchronizes dynamics and compromises metapopulation stability in the Glanville fritillary butterfly. *Proceedings of the Royal Society B: Biological Sciences*, 282, 20150173.
- Thibault, K.M. & Brown, J.H. (2008). Impact of an extreme climatic event on community assembly. *Proc Natl Acad Sci USA*, 105, 3410.
- Ummenhofer, C.C. & Meehl, G.A. (2017). Extreme weather and climate events with ecological relevance: a review. *Philosophical Transactions of the Royal Society B: Biological Sciences*, 372, 20160135.
- Vicente-Serrano, S.M., Beguería, S. & López-Moreno, J.I. (2009). A Multiscalar Drought Index Sensitive to Global Warming: The Standardized Precipitation Evapotranspiration Index. *J. Climate*, 23, 1696–1718.

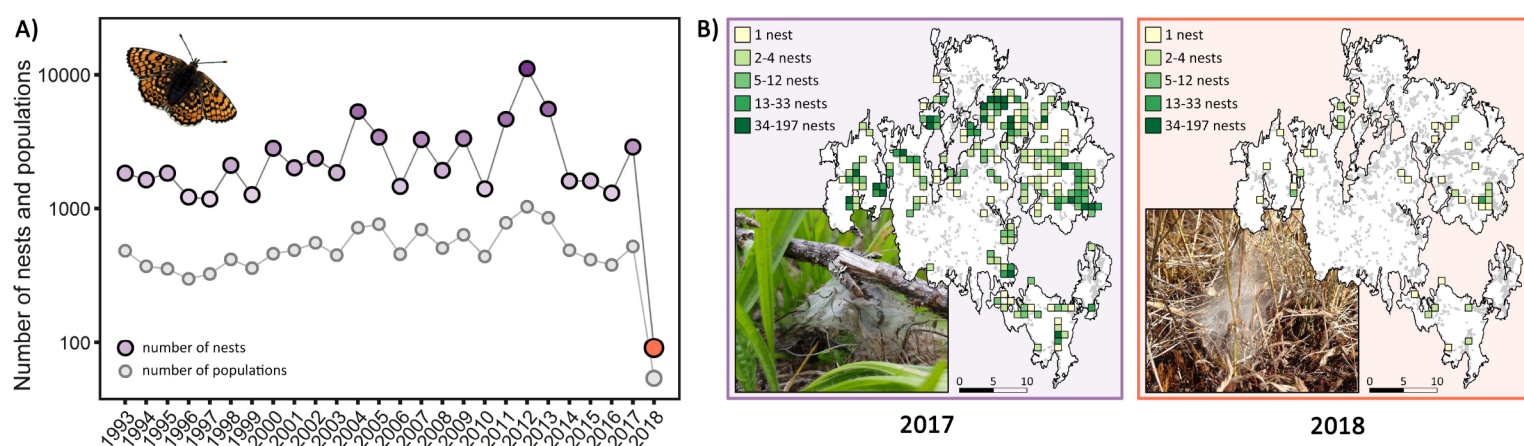

**Figure 1.** Population dynamics and demographic decline of the Glanville fritillary butterfly metapopulation on the Åland islands, Finland. A) Population dynamics of the butterfly metapopulation in years 1993-2018. The coloured dots represent the number of nests counted in yearly surveys, and the grey dots the number of occupied habitat patches in each year (y-axis represents a 10-log scale). Photograph depicts a female Glanville fritillary butterfly, *Melitaea cinxia* (photo credit: Tari Haahtela). B) The number of larval nests found during autumn surveys on the Åland islands in 2017 (left-hand panel; average climatic conditions) and 2018 (right-hand panel; extreme climatic event). Coloured squares indicate the number of nests per square kilometre. Surveyed but unoccupied habitat patches are shown in grey. Photographs represent larval nests on a typical *Plantago lanceolata* host plant (left-hand panel; photo credit: Ana Salgado), and on *P. lanceolata* affected by drought (right-hand panel; photo credit: Felix Sperling).

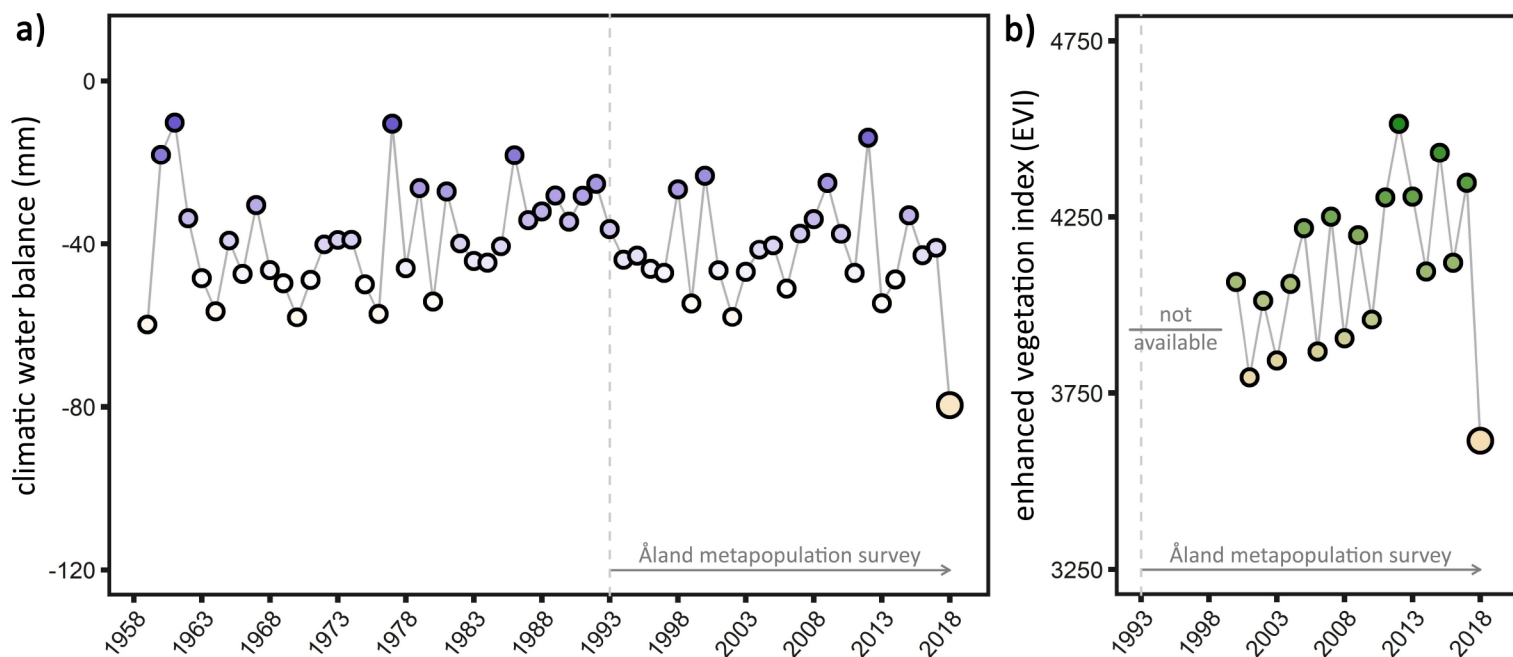

Figure 2. Meteorological and vegetation index data showing the extremity of the drought in 2018. A) Mean water balance (mm; precipitation - potential evapotranspiration) in April-August in years 1961-2018 derived from the Jomala climate station database in Åland. B) Mean Enhanced Vegetation Index (EVI; a measure of plant productivity) in the 4,415 habitat patches of the Glanville fritillary butterfly in the Åland islands in June-August from 2000 to 2018 derived from bands 1 and 2 of the MODIS on board NASA's Terra satellite. All climatic variables and monthly values are represented in figure S1.



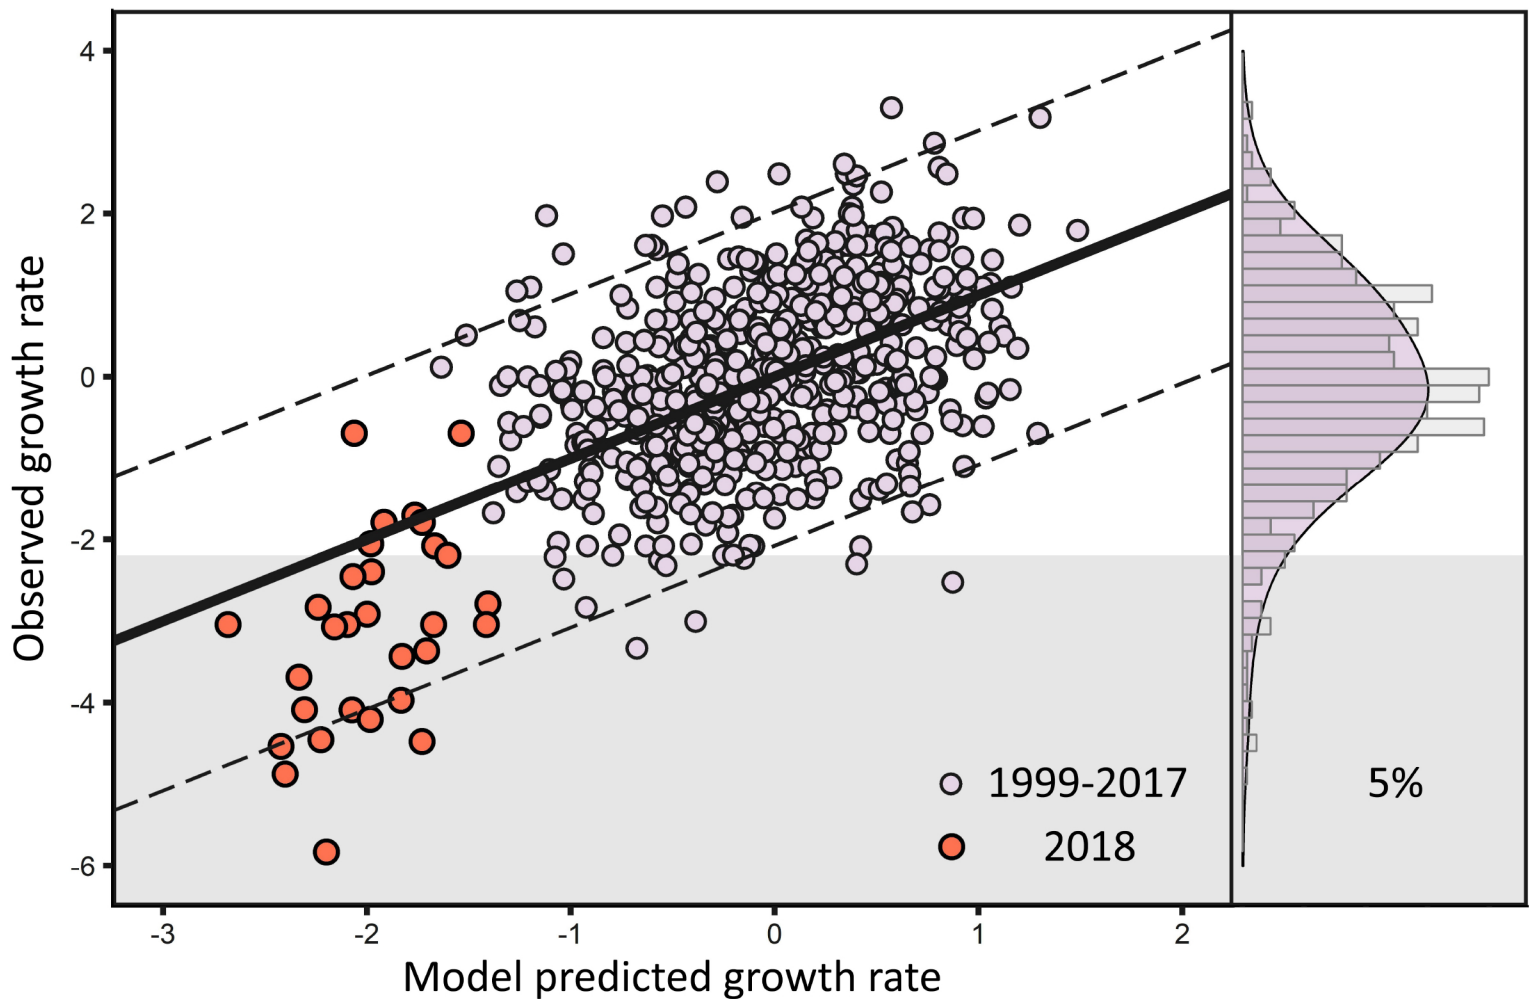

Figure 3. The relationship between observed and fitted population growth rates of the Glanville fritillary butterfly populations in the Åland islands from a linear mixed effects model with water balance values across the butterfly's life cycle as predictors of population growth rate at the semi-independent network level. The purple dots illustrate observations for years 1999-2017, while observations for 2018 are given in red. Dashed lines represent the 95% interval of model residuals. The right-hand panel shows a histogram of the distribution of population growth rate values in 1999-2018, with the shaded area highlighting the values in the lowest 5% range of the population growth rate distribution.

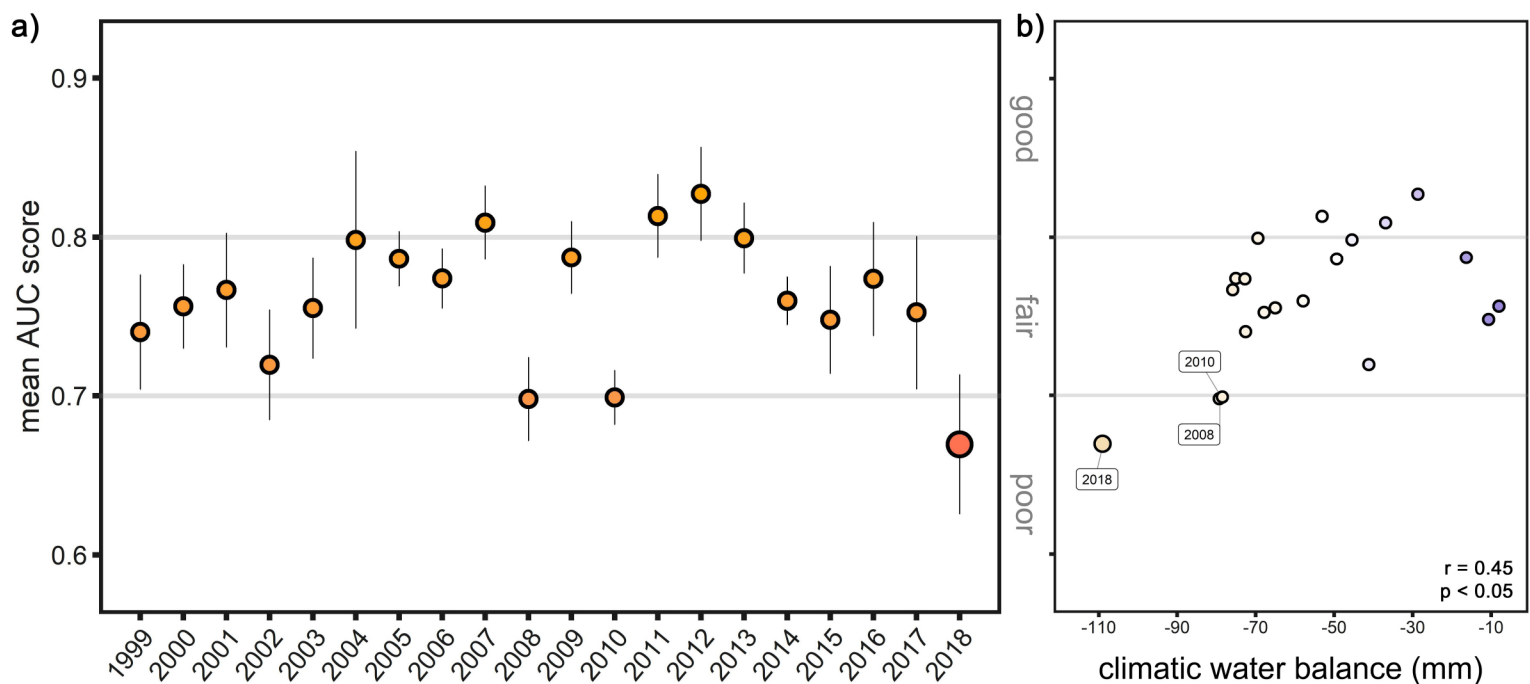

Figure 4. The predictability of local extinctions in a butterfly metapopulation. A) Model performance – quantified using the area under the ROC (receiver operating characteristic) curve – declined considerably in 2018, suggesting the extinction probability could not be accurately estimated using information on patch area, resource abundance, grazing, and population density in the previous year (see table S3). Meanwhile, these covariates captured extinction risk reasonably well in other years. Models were trained on ten random subsets of 80% of the available data. Plotted values correspond to mean values and line segments to standard error bars. As a general rule an AUC score of  $\leq 0.7$  is considered poor discrimination,  $0.7 \leq \text{AUC score} < 0.8$  is considered fair, and  $0.8 \leq \text{AUC score} < 0.9$  is considered good discrimination (Swets 1988). B) Some of the other years showing reduced model performance (e.g. 2008 and 2010) are also characterized by water deficits during summer. The x-axis represents the mean water balance (mm; precipitation - potential evapotranspiration) in May-July, and Spearman's rho and p-value are displayed in the plot.

**Supplementary Table 1.** Overview of the Glanville fritillary metapopulation long-term data and population growth rates in the viable semi-independent habitat patch networks (SINs).

| Long term data |         |             |       |           |           | SIN growth rates      |               |
|----------------|---------|-------------|-------|-----------|-----------|-----------------------|---------------|
| Year           | Patches | Populations | Nests | %Occupied | Abundance | GR <sub>SIN</sub> (N) | % in lower 5% |
| 1993           | 1324    | 485         | 1834  | 36.63     | 3.781     | na                    | na            |
| 1994           | 1379    | 372         | 1636  | 26.98     | 4.398     | 33                    | 12.1          |
| 1995           | 1374    | 356         | 1833  | 25.91     | 5.149     | 31                    | 0.0           |
| 1996           | 1333    | 300         | 1218  | 22.51     | 4.060     | 31                    | 3.2           |
| 1997           | 1507    | 326         | 1176  | 21.63     | 3.607     | 31                    | 3.2           |
| 1998           | 2792    | 418         | 2101  | 14.97     | 5.026     | 32                    | 0.0           |
| 1999           | 3927    | 360         | 1267  | 9.17      | 3.519     | 32                    | 3.1           |
| 2000           | 2935    | 461         | 2808  | 15.71     | 6.091     | 33                    | 0.0           |
| 2001           | 3951    | 490         | 2011  | 12.40     | 4.104     | 31                    | 3.2           |
| 2002           | 3160    | 556         | 2359  | 17.59     | 4.243     | 32                    | 0.0           |
| 2003           | 3160    | 450         | 1849  | 14.24     | 4.109     | 31                    | 0.0           |
| 2004           | 3195    | 720         | 5308  | 22.54     | 7.372     | 32                    | 0.0           |
| 2005           | 3881    | 765         | 3399  | 19.71     | 4.443     | 33                    | 3.0           |
| 2006           | 3453    | 458         | 1461  | 13.26     | 3.190     | 33                    | 6.1           |
| 2007           | 3693    | 698         | 3259  | 18.90     | 4.669     | 32                    | 0.0           |
| 2008           | 3644    | 508         | 1922  | 13.94     | 3.783     | 31                    | 3.2           |
| 2009           | 3905    | 638         | 3318  | 16.34     | 5.201     | 32                    | 0.0           |
| 2010           | 3588    | 440         | 1401  | 12.26     | 3.184     | 32                    | 15.6          |
| 2011           | 3796    | 783         | 4644  | 20.63     | 5.931     | 32                    | 0.0           |
| 2012           | 3845    | 1031        | 11129 | 26.81     | 10.794    | 33                    | 0.0           |
| 2013           | 3704    | 854         | 5540  | 23.06     | 6.487     | 32                    | 0.0           |
| 2014           | 4371    | 490         | 1603  | 11.21     | 3.271     | 32                    | 0.0           |
| 2015           | 4186    | 416         | 1608  | 9.94      | 3.865     | 33                    | 3.0           |
| 2016           | 4203    | 381         | 1303  | 9.06      | 3.420     | 33                    | 0.0           |
| 2017           | 4352    | 523         | 2871  | 12.02     | 5.489     | 30                    | 0.0           |
| 2018           | 3343    | 54          | 91    | 1.62      | 1.685     | 30                    | 76.7          |

Patches: the number of habitat patches included in the survey (survey extended between 1997-1999; peripheral islands not included in 2018); Populations: the number of patches that were occupied by the butterfly; Abundance: the mean number of nests per population; GR<sub>SIN</sub> (N) the number of viable SINs (33) for which a population growth rate could be estimated; % in lower 5%: percentage of population growth rates that fall within the 5% most negative values recorded in the Åland islands (see figure 2 in the main text).



**Supplementary Table 2.** Estimated coefficients, their estimated standard errors, and 95% credible intervals for the model estimating the association between the standardized climatic water balance and SIN growth rates.

| Covariate                         | Est. coef. | Est. SE | 95% Cr.I. |         |
|-----------------------------------|------------|---------|-----------|---------|
|                                   |            |         | Lower     | Upper   |
| Intercept                         | -0.1105    | 0.0324  | -0.1745   | -0.0467 |
| WaB <sub>Diapause</sub>           | -0.1247    | 0.0463  | -0.2159   | -0.0327 |
| WaB <sub>Mar</sub>                | -0.0874    | 0.0350  | -0.1562   | -0.0184 |
| WaB <sub>Apr</sub>                | 0.1384     | 0.0468  | 0.0470    | 0.2295  |
| WaB <sub>May</sub>                | 0.3030     | 0.0518  | 0.2008    | 0.4033  |
| WaB <sub>Jun</sub>                | 0.2339     | 0.0428  | 0.1493    | 0.3178  |
| WaB <sub>Jul</sub>                | 0.3480     | 0.0541  | 0.2404    | 0.4535  |
| WaB <sub>Aug</sub>                | 0.1361     | 0.0393  | 0.0586    | 0.2130  |
| AR[1]                             | -0.2913    | 0.0391  | -0.3678   | -0.2152 |
| $\sigma_{(\text{SIN intercept})}$ | 0.0714     | 0.0462  | 0.0032    | 0.1713  |
| $\sigma_{\text{res}}$             | 1.0304     | 0.0260  | 0.9804    | 1.0821  |

AR[1]: first-order autocorrelation term; WaB<sub>Diapause</sub>: Average water balance during the diapause period; WaB<sub>Mon</sub>: Monthly water balance;  $\sigma_{(\text{SIN intercept})}$ : standard deviation of random intercepts;  $\sigma_{\text{res}}$ : residual standard deviation.

**Supplementary Table 3.** Coefficients from a fit linear mixed effects model with year as a random effect, highlighting the importance of patch area, resource abundance, grazing, and population demography from the previous year on extinction probability. Data include 9784 potential extinction events in the last two decades.

| Covariate                         | Est. coef. | Est. SE | z-value | p-value |
|-----------------------------------|------------|---------|---------|---------|
| Intercept                         | -0.398     | 0.223   | -1.788  | 0.074   |
| log (patch area)                  | -0.327     | 0.029   | -11.472 | < 0.001 |
| log (nests in previous year)      | -0.784     | 0.031   | -24.998 | < 0.001 |
| Number of nests in nearby patches | -0.306     | 0.037   | -8.240  | < 0.001 |
| Abundance dominant host           | -0.465     | 0.028   | -16.732 | < 0.001 |
| Dry plants percentage             | -0.004     | 0.031   | -0.115  | 0.909   |
| Grazing percentage                | 0.149      | 0.025   | 5.955   | < 0.001 |

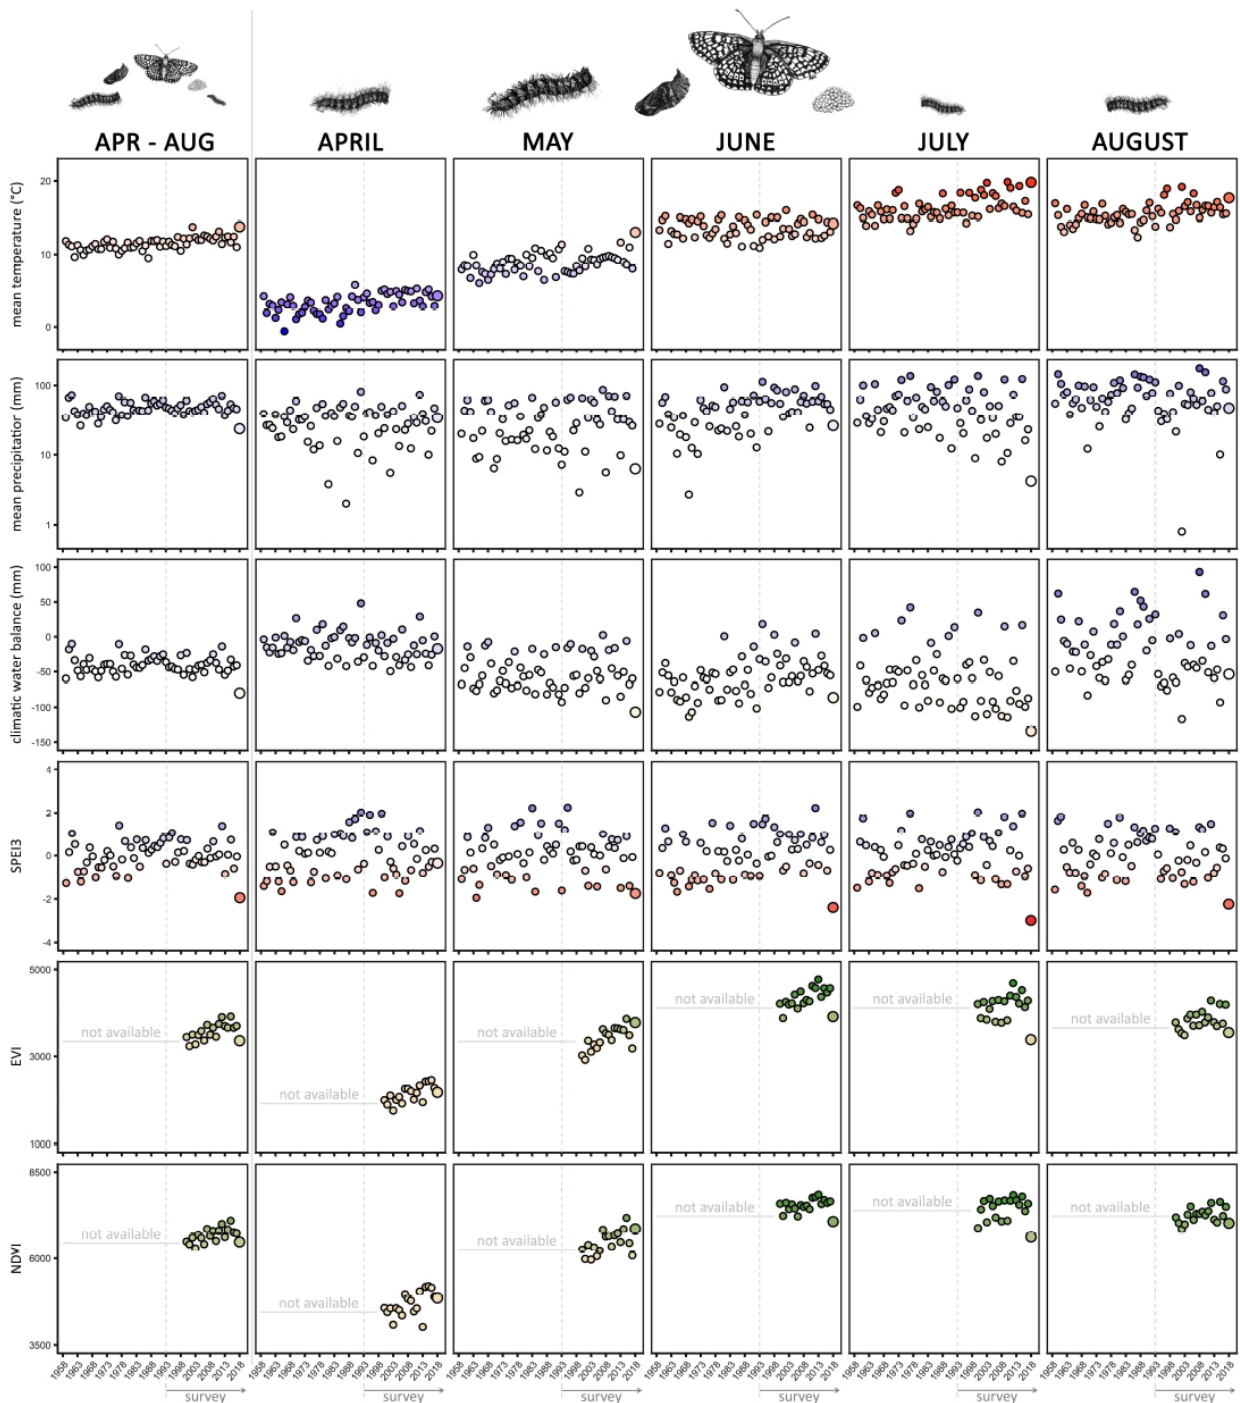

**Supplementary Figure 1.** Meteorological (Mean temperature; Mean precipitation; Mean climatic water balance (mm; precipitation - potential evaporation); SPEI3: Mean Standardised Precipitation-Evapotranspiration Index at a 3 month scalar) and vegetation indices (EVI: Mean Enhanced Vegetation Index; NDVI: Mean Normalized Difference Vegetation Index) data for the period of April-August (left), and then separately for each month corresponding to the different life stages of the butterfly. The meteorological data in 1958-2018 are derived from the Jomala climate station database in Åland. The vegetation index data were derived from bands 1 and 2 of the MODIS on board NASA's Terra satellite and calculated for the 4,415 habitat patches of the Glanville fritillary butterfly in the Åland islands. Illustrations courtesy of Luisa Woestmann.
